# Supplementary figures and images for: VisMET: a passive, efficient, and sensitive assessment of visuospatial memory in healthy aging, mild cognitive impairment, and Alzheimer's disease
Source: PubMed Central journal article supplement — Learn Mem. 2019 Mar;26(3):93–100. doi: 10.1101/lm.048124.118 (PMC6380203; doi:10.1101/lm.048124.118), 2019-03

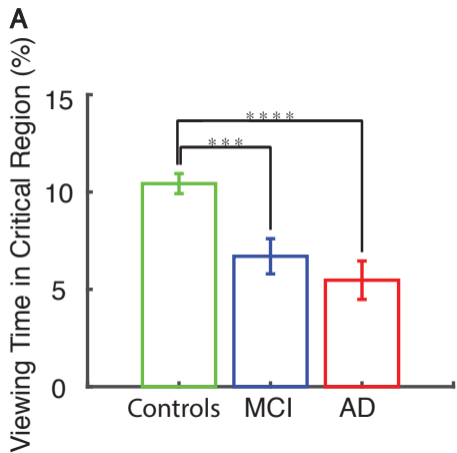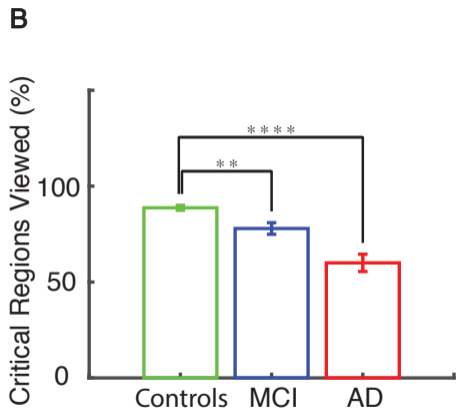

Supplement: supp_26.3.93_Supplemental_Figure_S1.pdf [file supp_26.3.93_Supplemental_Figure_S1.pdf]
